# Supplementary material
Source: Research Square preprint supplement (doi:10.21203/rs.3.rs-8884256/v1)
Supplement: Supplementary file 1 [file b1d097583233e97098b4bfa1.docx]

**Different alkali carbonates on the microstructure and photoluminescence properties of SrWO4:Tb3+ phosphors**

Xiaoxing Ma, Faxue Ma,* Dingcheng Yang, Aiyun Jiang

College of Engineering, Huanghe S & T University, Zhengzhou, 454000, mfxxmu@163.com


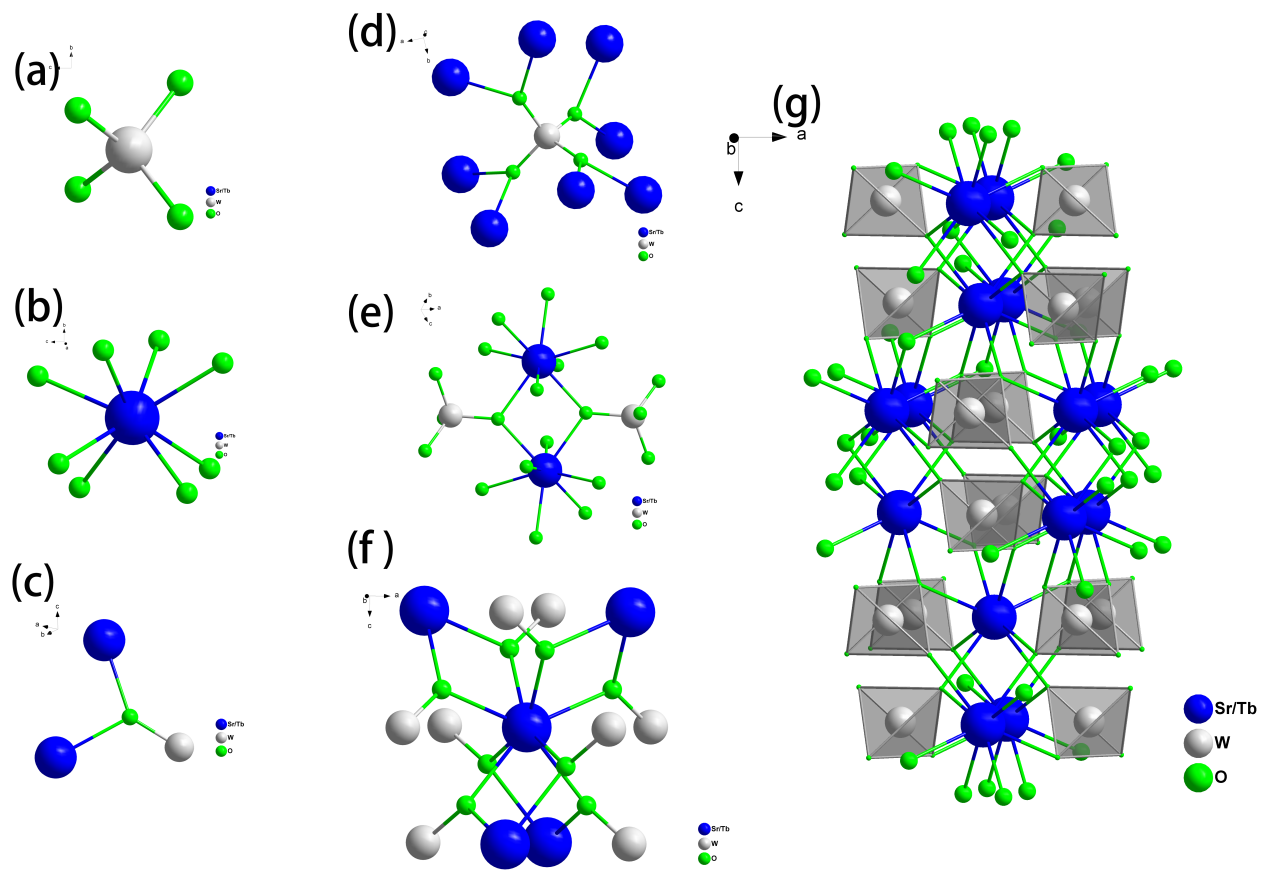


Figure S1 Construction of the SrWO4:0.4%Tb (Sr/Tb: blue; W: gray; O: green.): (a) the WO42-; (b) the coordination structure of the Sr/Tb atoms;(c) the coordination structure of the O atoms; (d)the coordination structure of the WO42- groups; (d) the connection mode of two WO42- groups; (f) the coordination mode of the WO42- group with Sr and W atoms; (g)the structure of SrWO4:0.4%Tb

Table S1 Some crystallographic data of SrWO4:0.4%Tb and SrWO4:0.4%Tb, 0.5%K

|  | SrWO4:0.4%Tb | SrWO4:0.4%Tb, 0.5%K |
| --- | --- | --- |
| **Space-group** | I41/a (88)-tetragonal | I41/a (88)-tetragonal |
| a (Å) | 5.4173(1) | 5.4157 |
| c (Å) | c=11.9512(2) | 11.9463 |
| V (Å3) | 350.74(1) | 350.38 |
| Rwp | 8.26% | 9.34% |
| Rp | 6.11% | 6.24% |


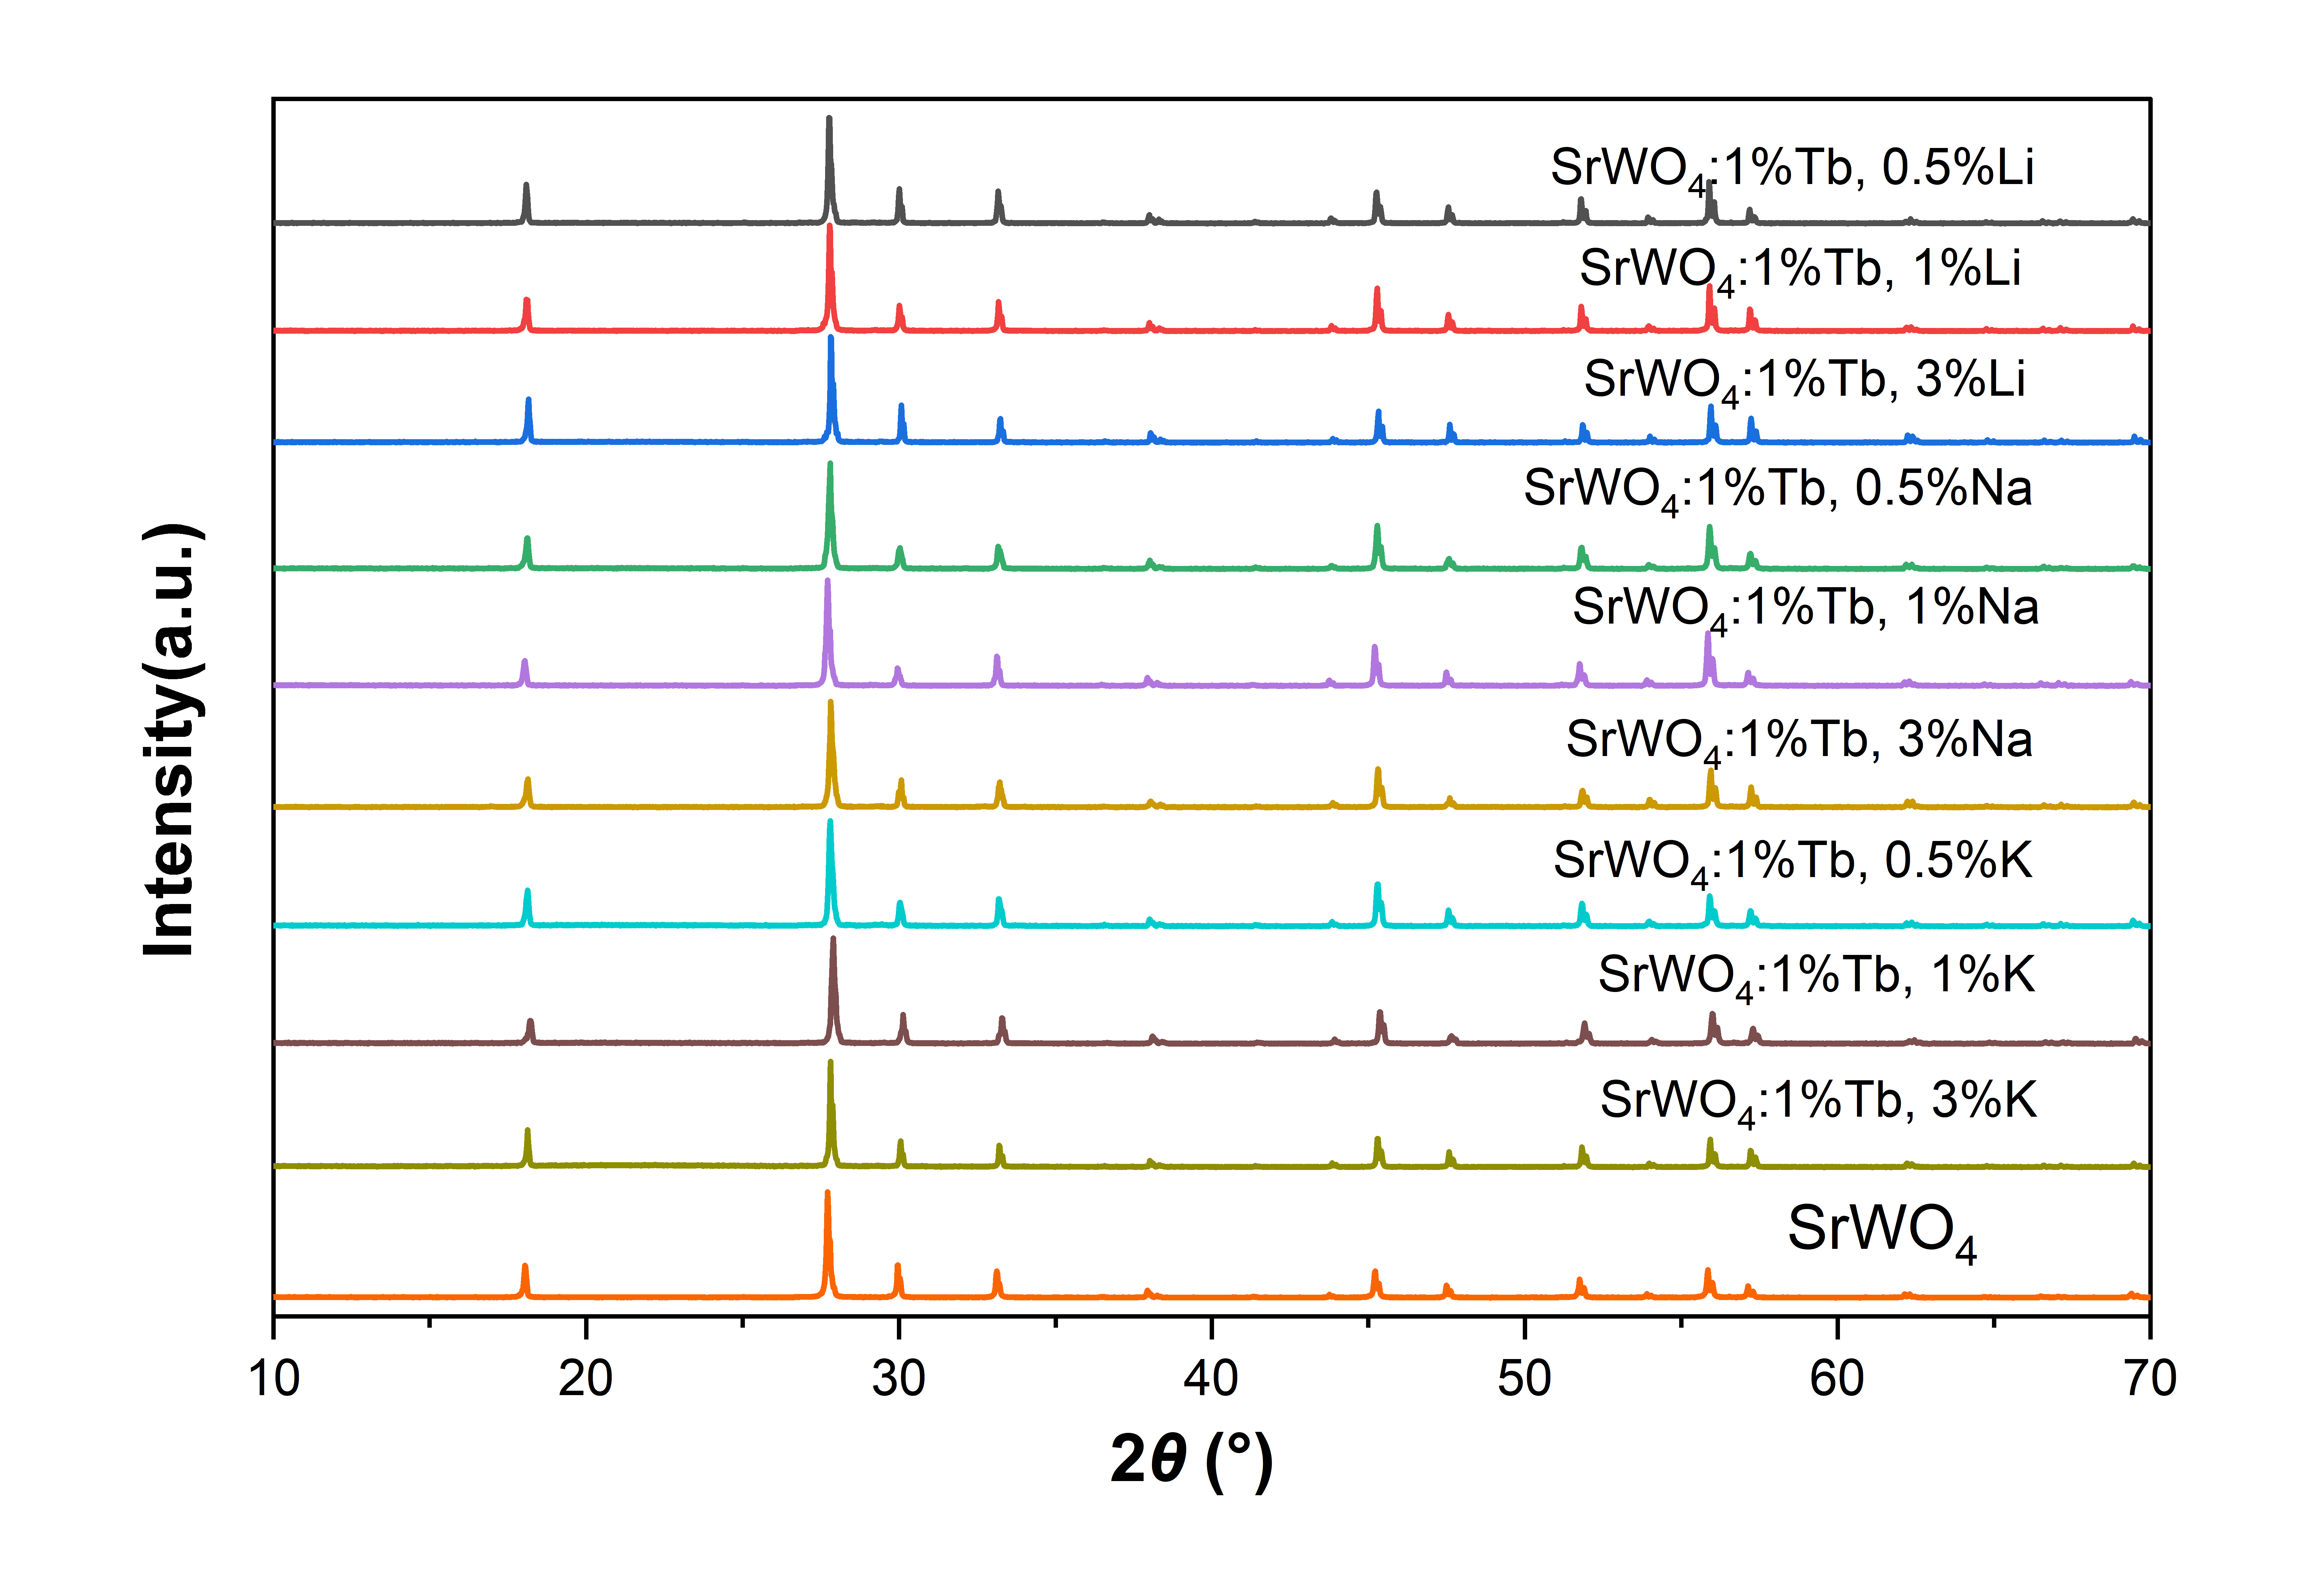


Figure S1 X-ray diffraction pattern of SrWO4:1%Tb, yA (A= Li, Na, K; y = 0.5, 1, 3) samples.


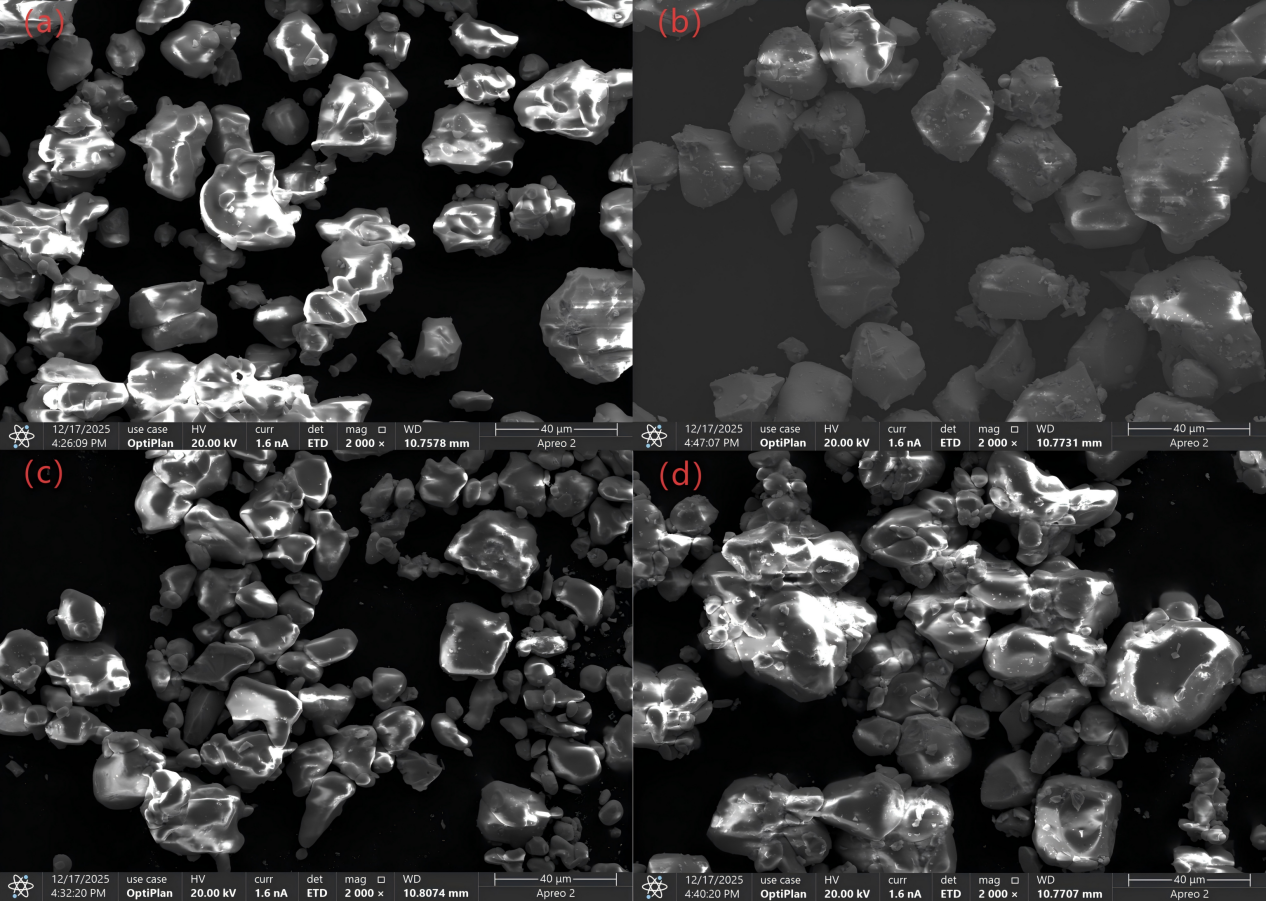


Figure S2 **.** SEM analysis of (a) SrWO4:0.4%Tb; (b) SrWO4:0.4%Tb, 0.5%Li; (c) SrWO4:0.4%Tb, 0.5%Na; (d) SrWO4:0.4%Tb, 0.5%K.
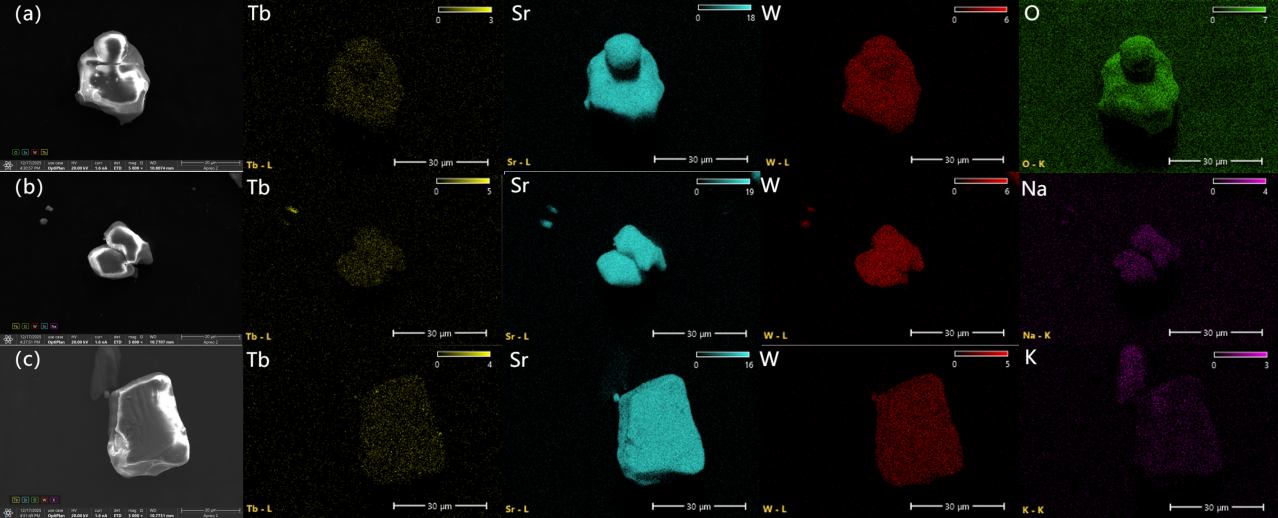


Figure S3EDS elemental mapping analysis of (a) SrWO4:0.4%Tb; (b) SrWO4:0.4%Tb, 0.5%Na; (c)SrWO4:0.4%Tb, 0.5%K.


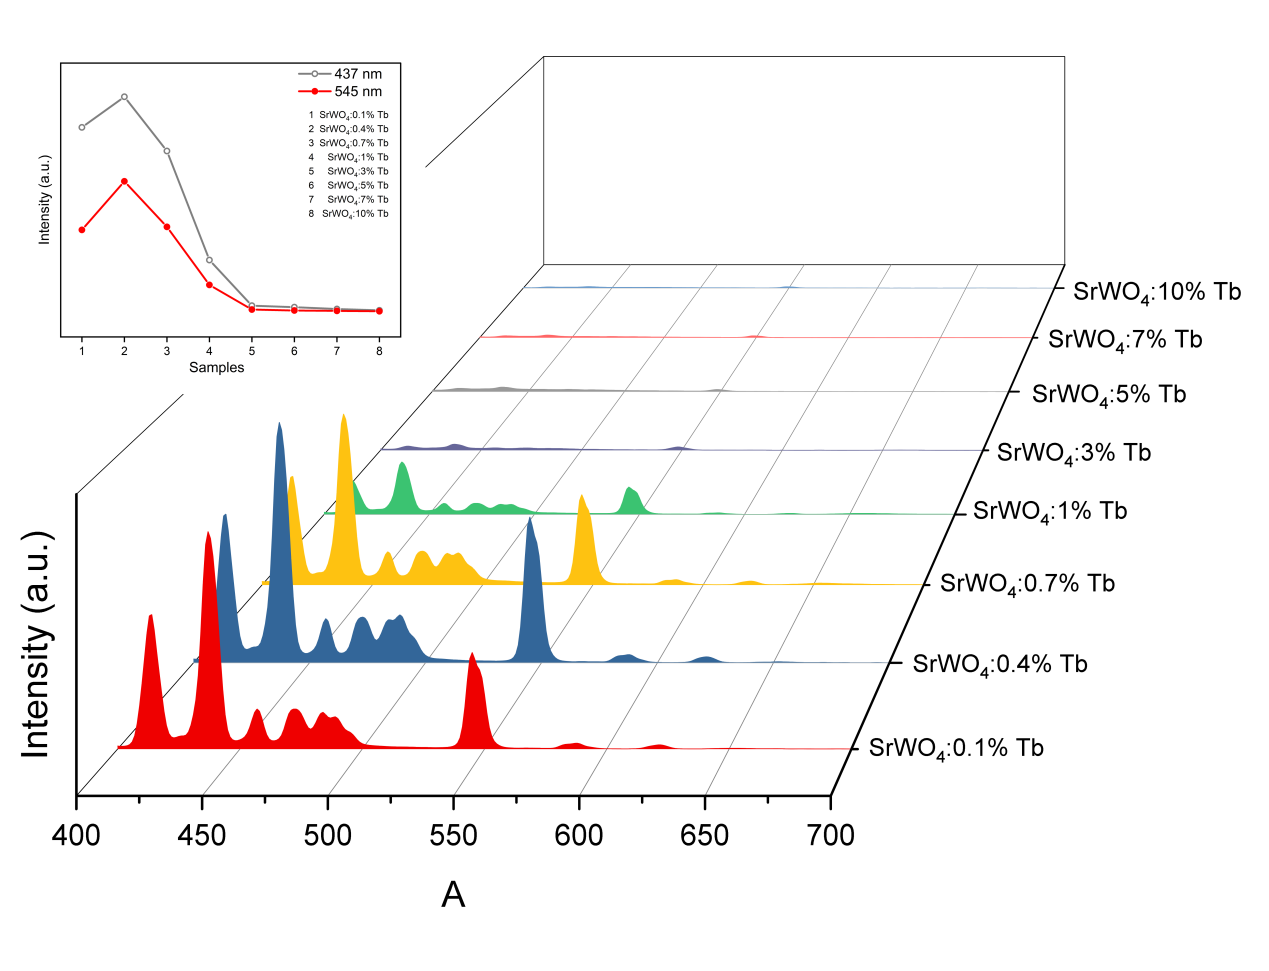


Figure S4 Concentration quenching of Tb3+ doped in SrWO4 phosphor Excited by 545 nm (inset：The intensity of the 437 nm and 545 nm peak at different doping contents）
